# Supplementary material
Source: publisher figshare collection journal article supplement (https://tandf.figshare.com/ndownloader/files/12864224)
Supplement: Supplementary file 1 [file 12864224]

The Structural Glaciology of Isunguata Sermia, West Greenland (ca. July 2015)

Christine Jones\*, Jonathan Ryan, Tom Holt, and Alun Hubbard (\*cs\_jones@outlook.com)

Centre for Glaciology, Aberystwyth University, Wales, UK

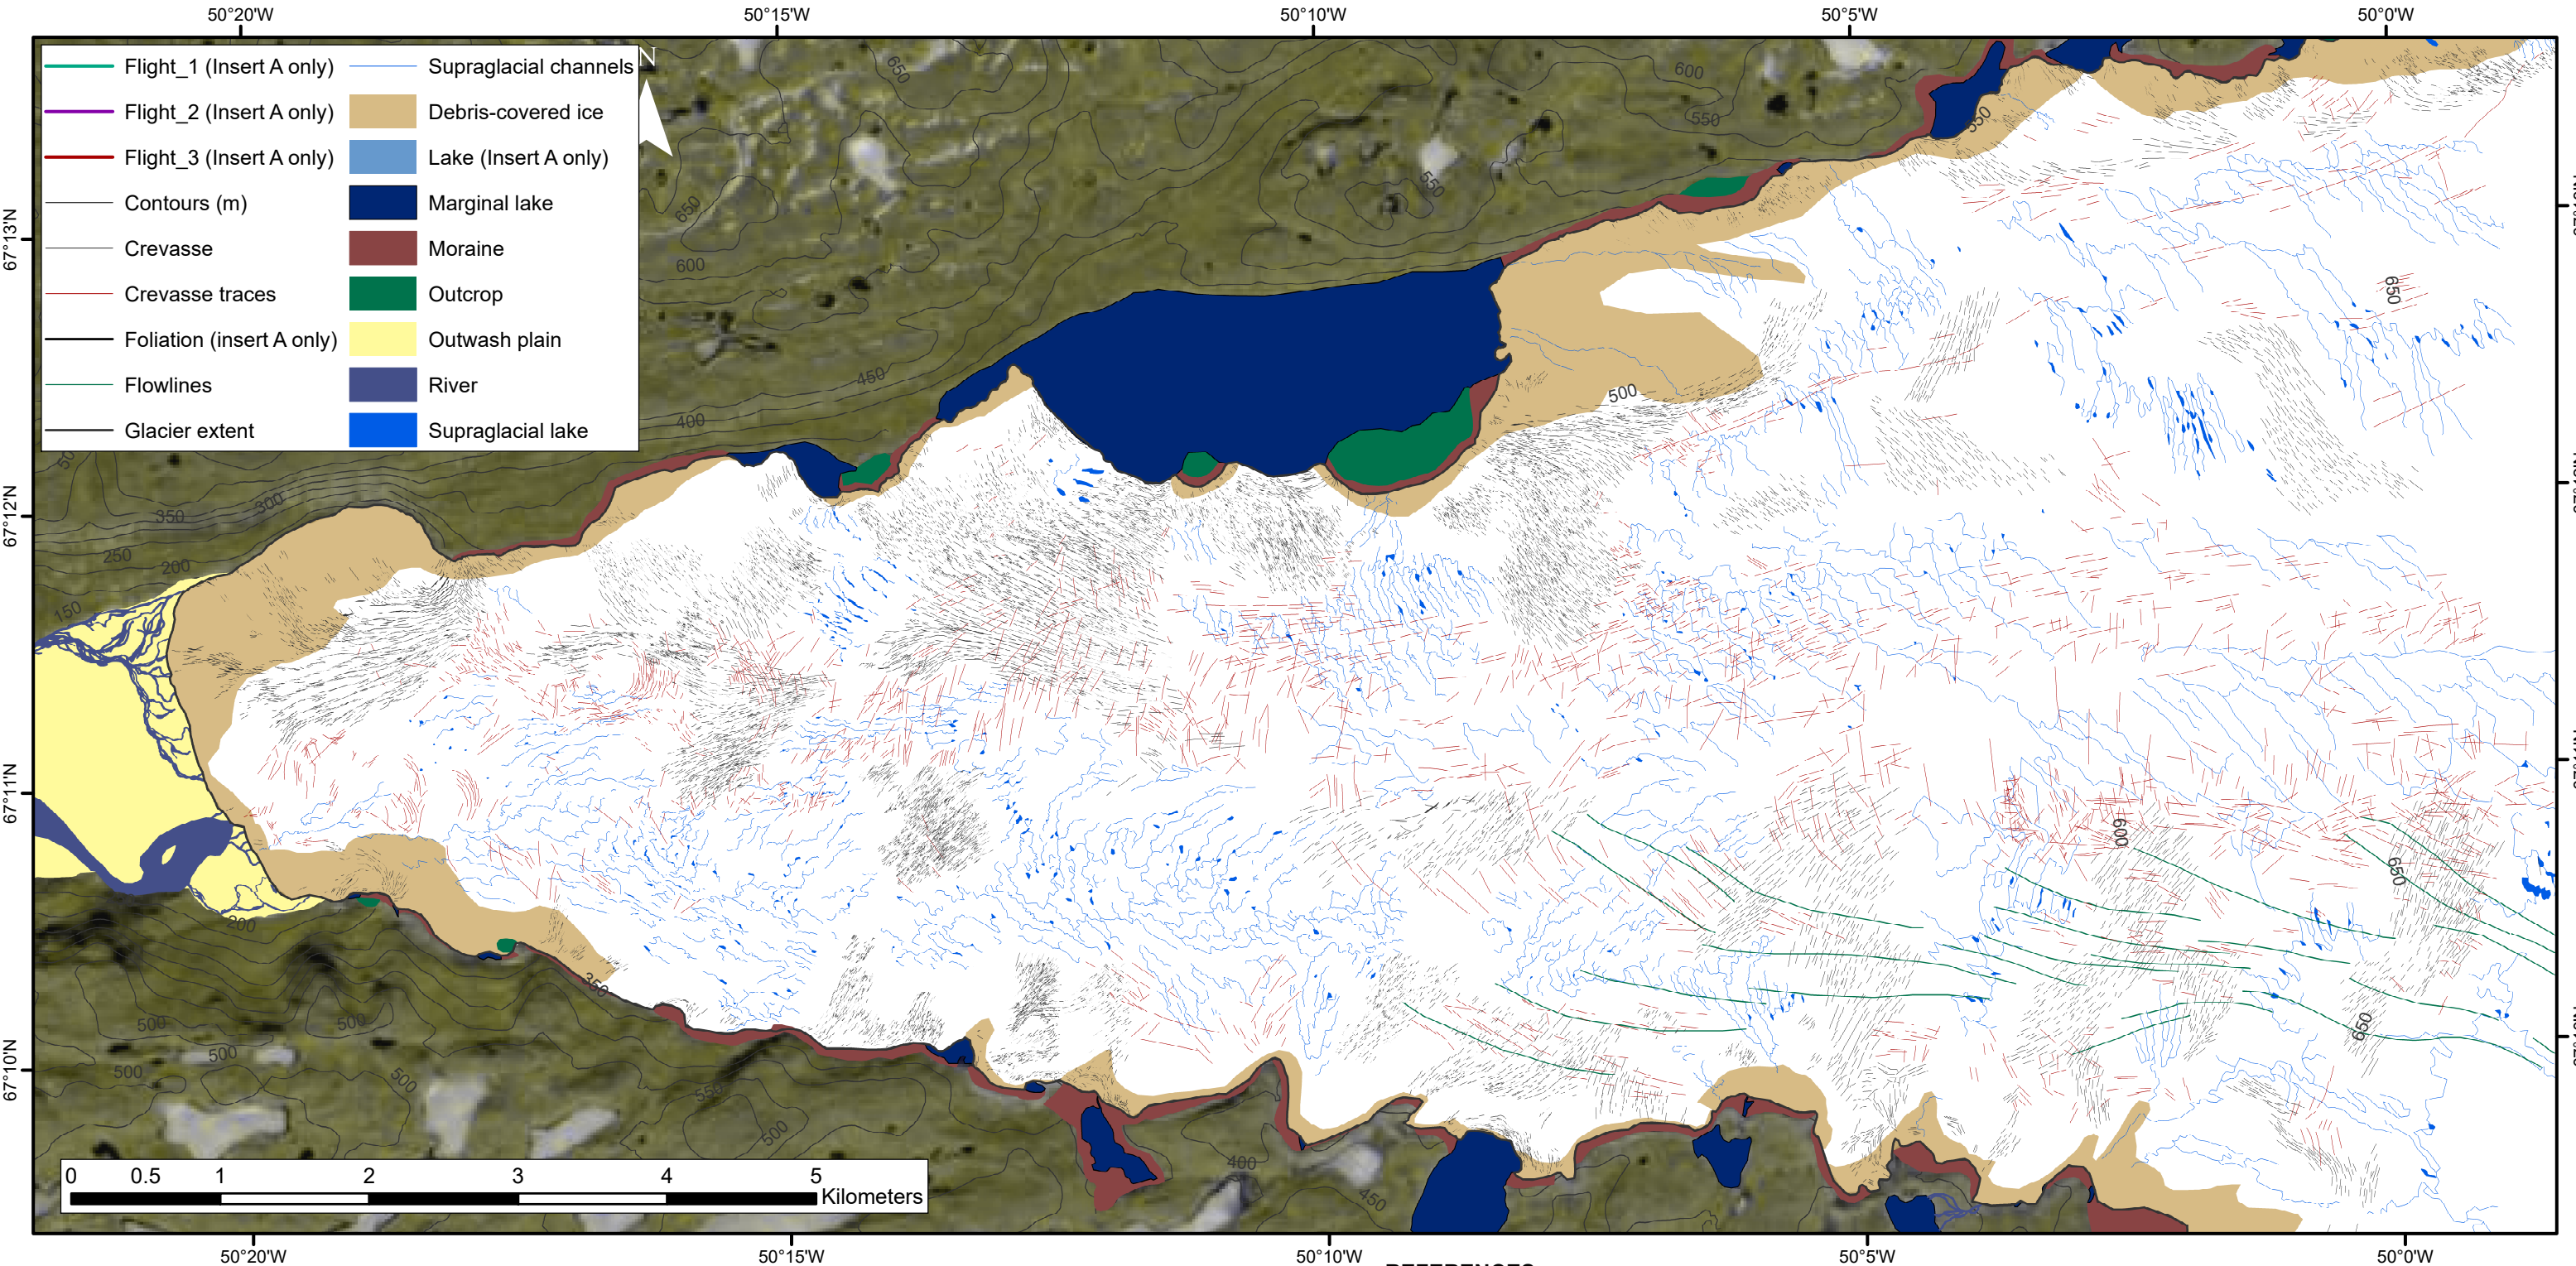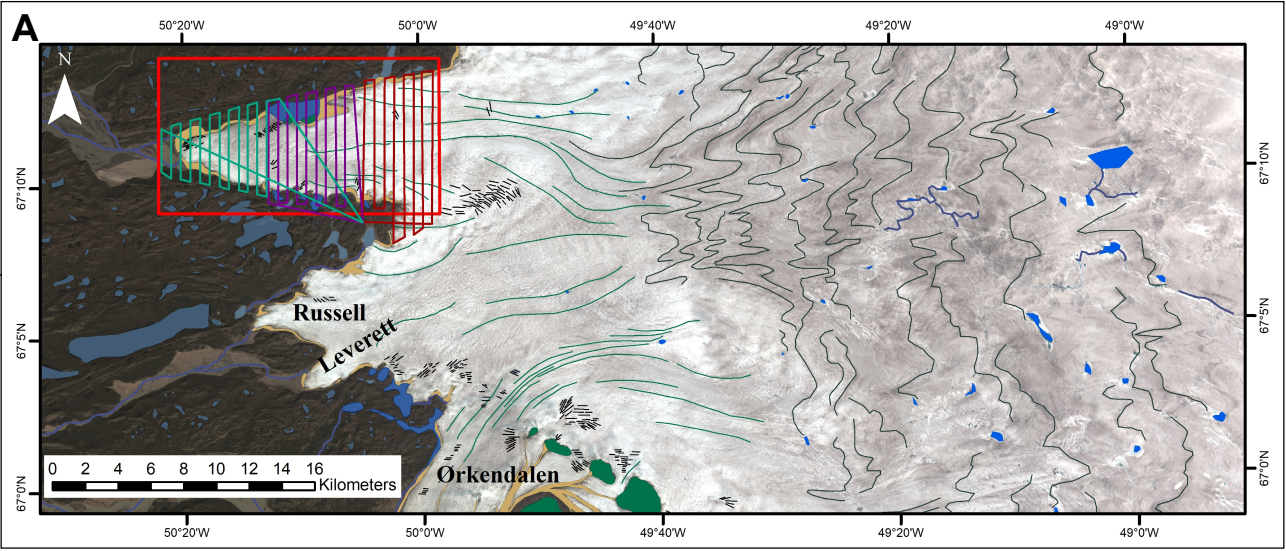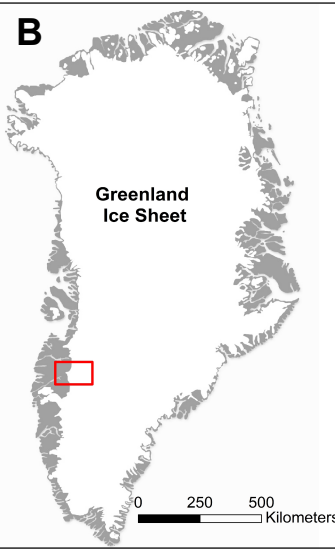

REFERENCES

Aerial photography: July 12th 2015; Flying height: 1000m a.s.l (average)  
Air photography by J. Ryan (Sony NEX-5N, 16.1 MPix)  
Topographic model (composed of 2,556 images) by C. Jones generated with Agisoft PhotoScan.  
Geographical representation by C. Jones, with the following layout:  
Datum: WGS1984; Projection: UTM Zone22N; Unit: Metres; Scale 1:42,000

Background imagery: Sentinel-2A, 20 m resolution. Date of acquisition: 31May 2017.  
Scene ID: L1C\_T22WEV\_A010132\_20170531T150133.  
Contours produced from the 30m resolution Greenland Ice Mapping Project (GIMP) DEM (Howat, Negrete, and Smith., 2014)

Insert A: Location of Isunguaga Sermia within the Kangerlussuaq region of the western sector of the GrIS, with the UAV flight paths illustrated. The neighbouring glaciers of Russell, Leverett and Ørkendalen have not been considered in this study, however the extent of the structural features as seen from 30m Landsat 8 imagery have been digitised within this insert to highlight the differences between structural mapping of UAV and landsat imagery. Background: Landsat 8, 30 m resolution. Acquisition date: 08 July 2015. Scene ID: LC08\_L1TP\_007013\_20150708\_20170407\_01\_T1

Insert B: Location of Kangerlussuaq within the Greenland Ice Sheet
